# Supplementary material for: Inulin reduces visceral adipose tissue mass and improves glucose tolerance through altering gut metabolites
Source: PubMed Central journal article supplement (PMC9331483; doi:10.1186/s12986-022-00685-1), 2022-07-28

# FigureS1

(A)

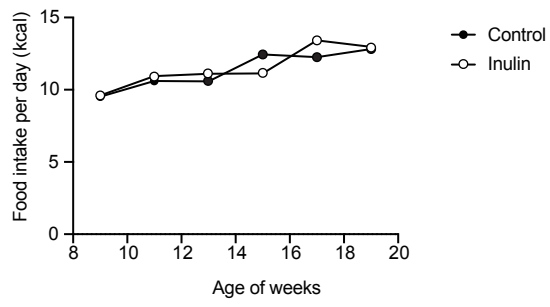

(B)

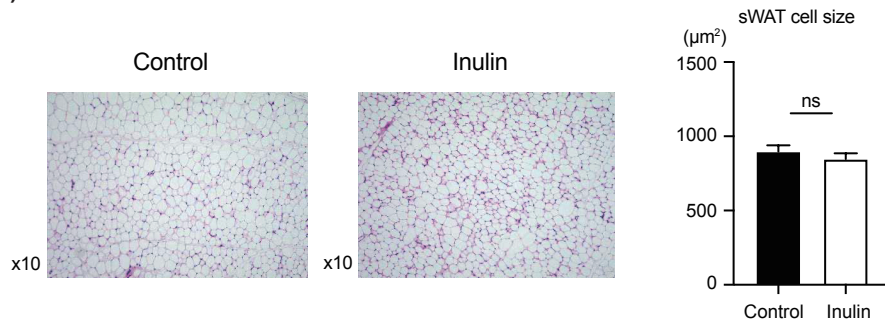

(C)

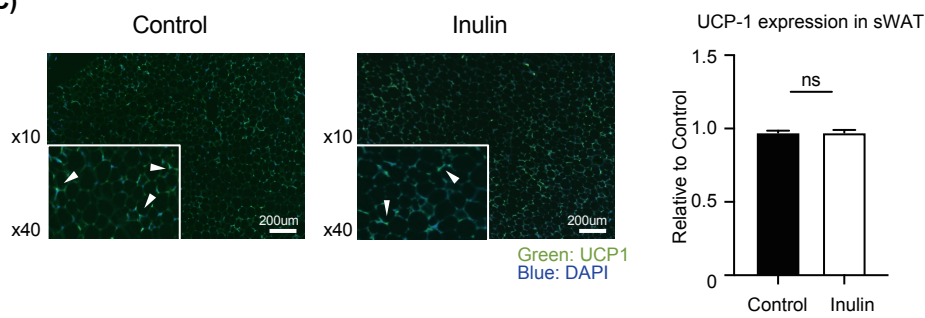

Supplement: 12986_2022_685_MOESM2_ESM.pdf [file 12986_2022_685_MOESM2_ESM.pdf]
